# Supplementary material for: Dual-emissive solid-state histidine-stabilized gold nanoclusters for applications in white-light generation
Source: Royal Society of Chemistry journal article supplement (doi:10.1039/d3na00555k), 2023-01-01
Supplement: d3na00555k1.pdf [file d3na00555k1.pdf]

## Electronic Supplementary Information

### Dual-emissive solid-state histidine-stabilized gold nanoclusters for applications in white-light generation

Markus Zetes<sup>a,b,#</sup>, Alexandru-Milentie Hada<sup>a,b,#</sup>, Milica Todea<sup>c,d</sup>, Luiza Ioana Gaina<sup>e</sup>,  
Simion Astilean<sup>a,b</sup>, Ana-Maria Craciun<sup>a,\*</sup>

<sup>a</sup> Nanobiophotonics and Laser Microspectroscopy Center, Interdisciplinary Research Institute in Bio-Nano-Sciences, Babes-Bolyai University, 42 T. Laurian Str., 400271, Cluj-Napoca, Romania

<sup>b</sup> Faculty of Physics, Babes-Bolyai University, 1 M. Kogalniceanu str., 400084, Cluj-Napoca, Romania

<sup>c</sup> Nanostructured Materials and Bio-Nano-Interfaces Center, Interdisciplinary Research Institute in Bio-Nano-Sciences, Babes-Bolyai University, 42 T. Laurian Str., 400271, Cluj-Napoca, Romania

<sup>d</sup> Department of Molecular Sciences, Faculty of Medicine, Iuliu Hațieganu University of Medicine and Pharmacy, Cluj-Napoca, Romania

<sup>e</sup> Research Center on Fundamental and Applied Heterochemistry, Faculty of Chemistry and Chemical Engineering, Babes-Bolyai University, 11 A. Janos Str., 400028, Cluj-Napoca, Romania

\*Corresponding author: [ana.gabudean@ubbcluj.ro](mailto:ana.gabudean@ubbcluj.ro)

# These authors contributed equally to this work

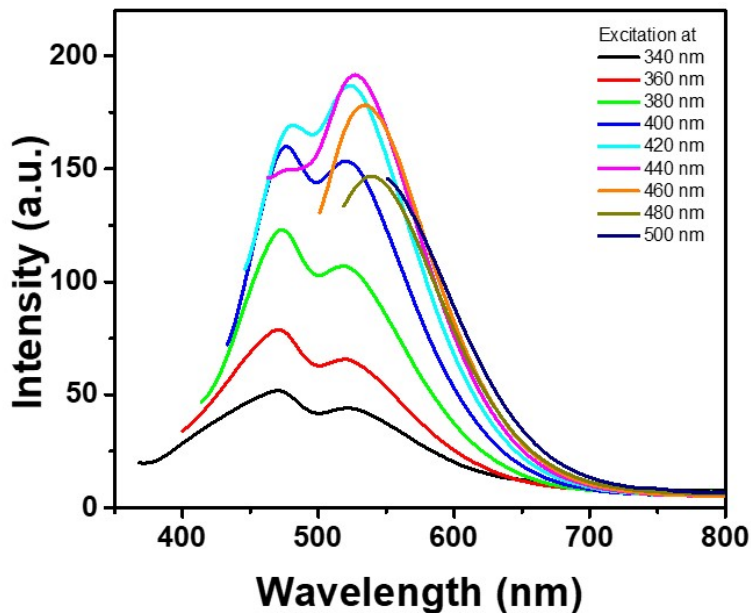

**Figure S1.** PL spectra of powder His-AuNCs at different excitation wavelengths.

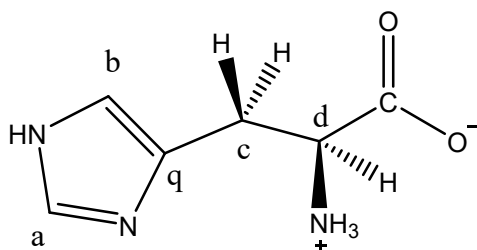

**Figure S2.** The L-histidine structure with the imidazole ring and the numbering used to assign the signals in  $^1\text{H}$  and  $^{13}\text{C}$  NMR spectra.

### L-Histidine

$^1\text{H}$ -NMR (600MHz,  $\text{D}_2\text{O}$ ,  $\delta\text{ppm}$ ): 7.56 (s, 1H, Ha), 6.87(s, 1H, Hb), 3.80(dd, 1H,  $J=8.01\text{Hz}$ ,  $J=4.75\text{Hz}$ , Hd), 3.04(dd, 1H,  $J=0.74\text{Hz}$ ,  $J=15.4\text{Hz}$  Hc'), 2.94(dd, 1H,  $J=8.01\text{Hz}$ ,  $J=15.4\text{Hz}$ , Hc)

$^{13}\text{C}$ -NMR (150MHz,  $\text{D}_2\text{O}$ ,  $\delta\text{ppm}$ ): 28.1Cc, 54.7Cd, 116.6Cb, 132.1Cq, 136.2Ca, 173.9 Cq(C=O)

### His-AuNCs

$^1\text{H}$ -NMR (600MHz,  $\text{D}_2\text{O}$ ,  $\delta\text{ppm}$ ): 7.78(s, 1H, Ha), 6.97(s, 1H, Hb), 3.85(dd, 1H,  $J=7.8\text{ Hz}$ ,  $J=5.0\text{ Hz}$ , Hd), 3.10(dd, 1H,  $J=15.5\text{Hz}$ ,  $J=5.0\text{Hz}$ , Hc') 3.01(dd, 1H,  $J=15.5\text{ Hz}$ ,  $J=7.8\text{ Hz}$ , Hc)

$^{13}\text{C}$ -NMR (150MHz,  $\text{D}_2\text{O}$ ,  $\delta\text{ppm}$ ): 27.6 Cc, 54.5 Cd, 116.8 Cb, 131.2 Cq, 135.8 Ca, 173.5 Cq(C=)O

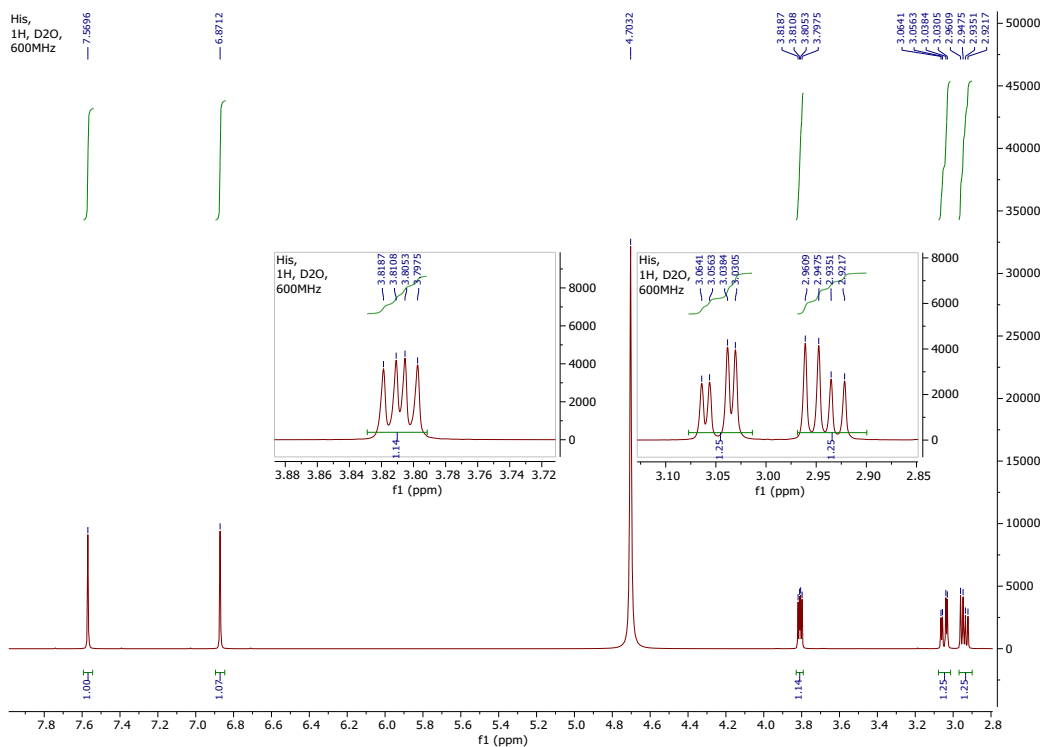

**Figure S3.**  $^1\text{H}$ -NMR spectra of L-histidine at 600 MHz in  $\text{D}_2\text{O}$ , including the detail of aliphatic region.

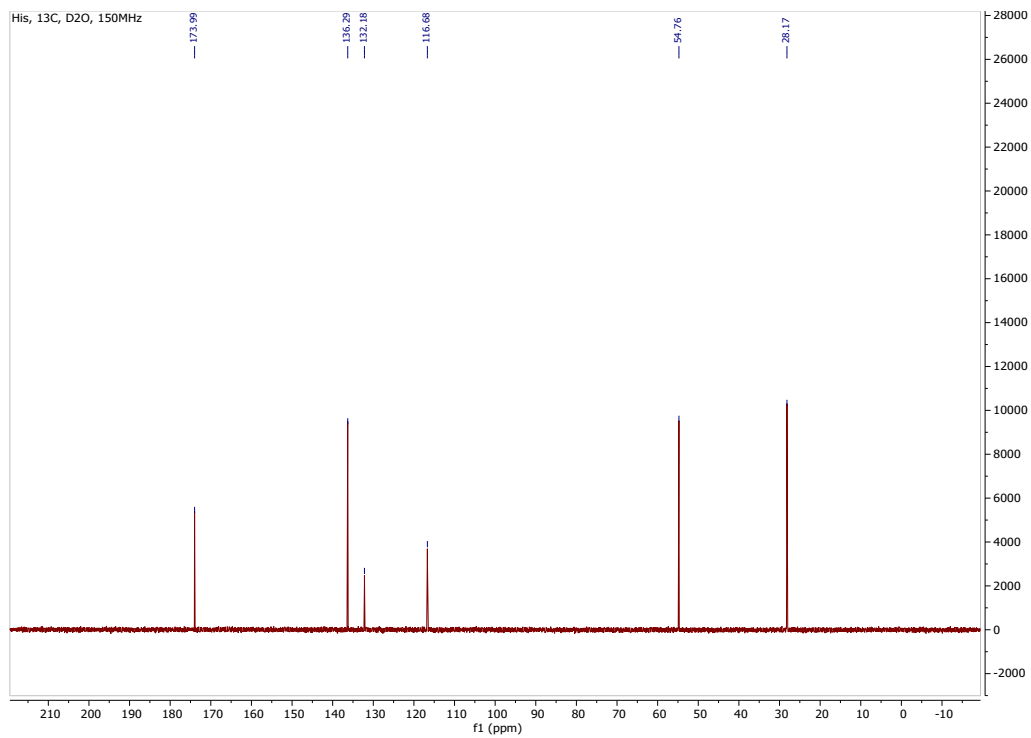

**Figure S4.** <sup>13</sup>C-NMR spectra of L-histidine at 150 MHz in D<sub>2</sub>O.

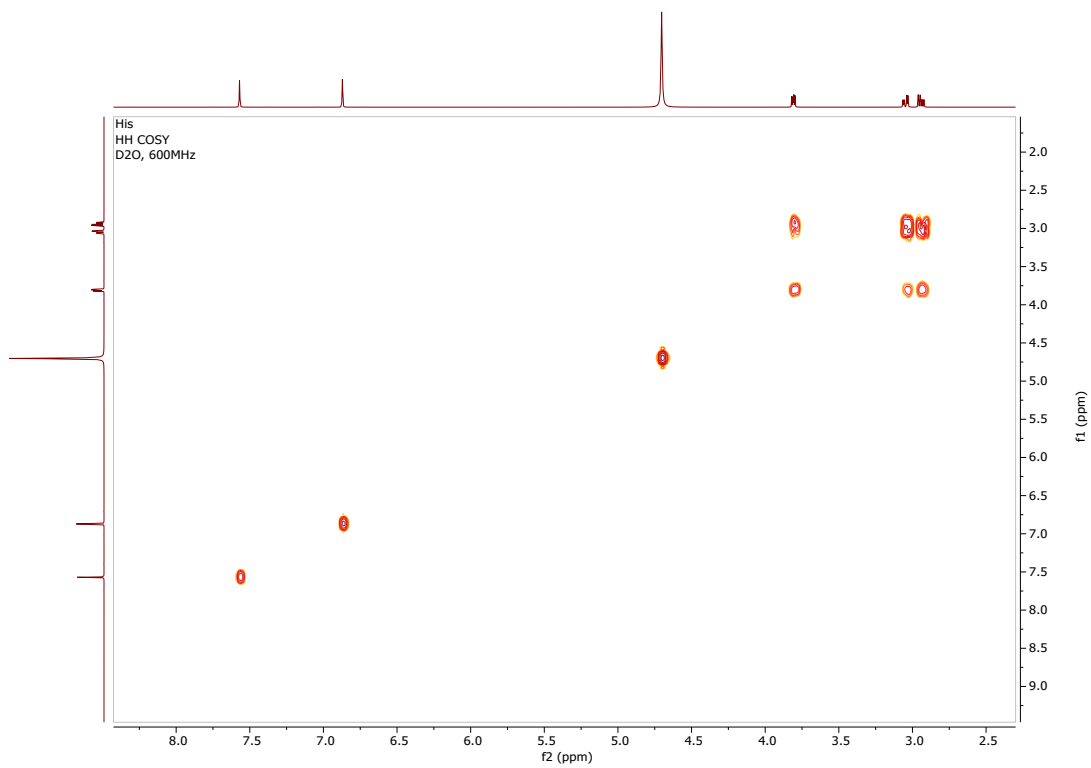

**Figure S5.** The <sup>1</sup>H-<sup>1</sup>H COSY spectra of L-histidine.

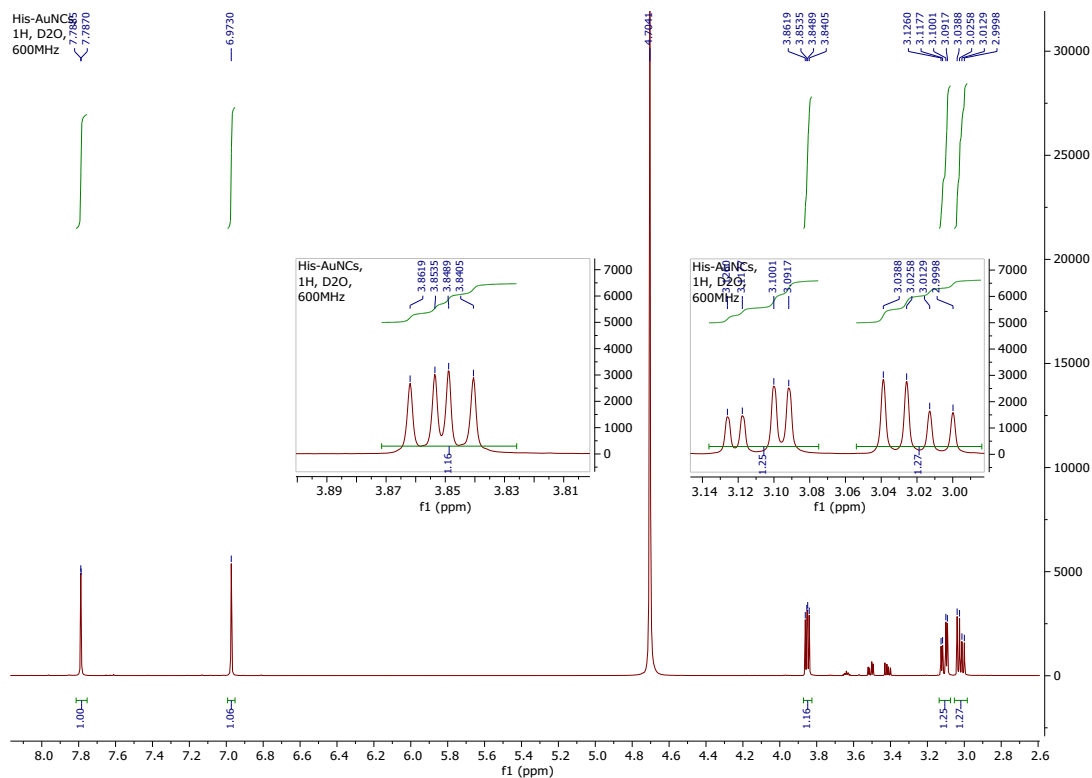

**Figure S6.**  $^1\text{H}$ -NMR spectra of His-AuNCs at 600 MHz in  $\text{D}_2\text{O}$ , including the detail of aliphatic region.

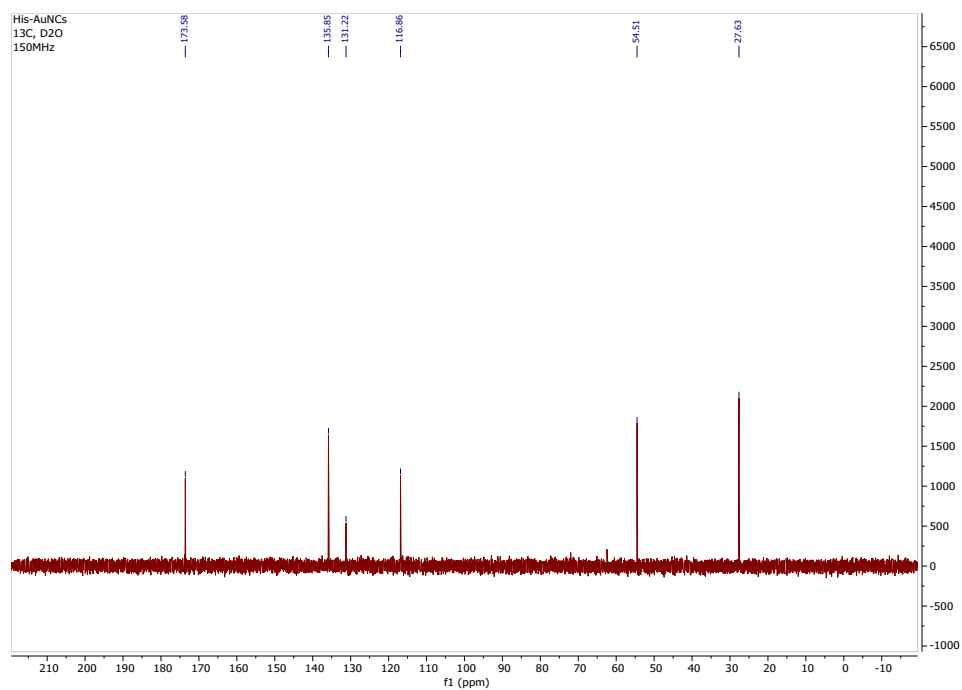

**Figure S7.**  $^{13}\text{C}$ -NMR spectra of His-AuNCs at 150 MHz in  $\text{D}_2\text{O}$ .

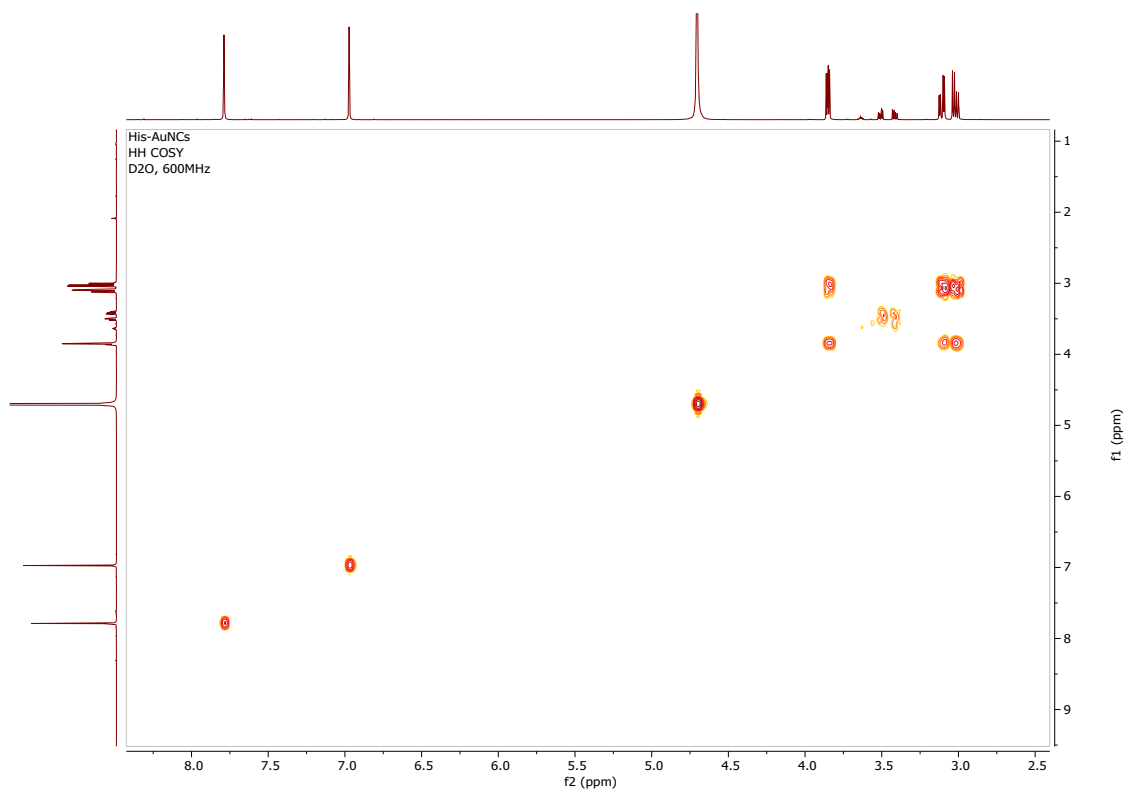

**Figure S8.** The  $^1\text{H}$ - $^1\text{H}$  COSY spectra of His-AuNCs.

**Table S1.** Elemental at% composition at the surface of the His and His-AuNCs samples.

| Sample    | at%  |      |      |     |     |
|-----------|------|------|------|-----|-----|
|           | O    | C    | N    | Cl  | Au  |
| His-AuNCs | 15.1 | 62.4 | 20.3 | 2.1 | 0.1 |
| His       | 17.6 | 64.5 | 17.9 | -   | -   |

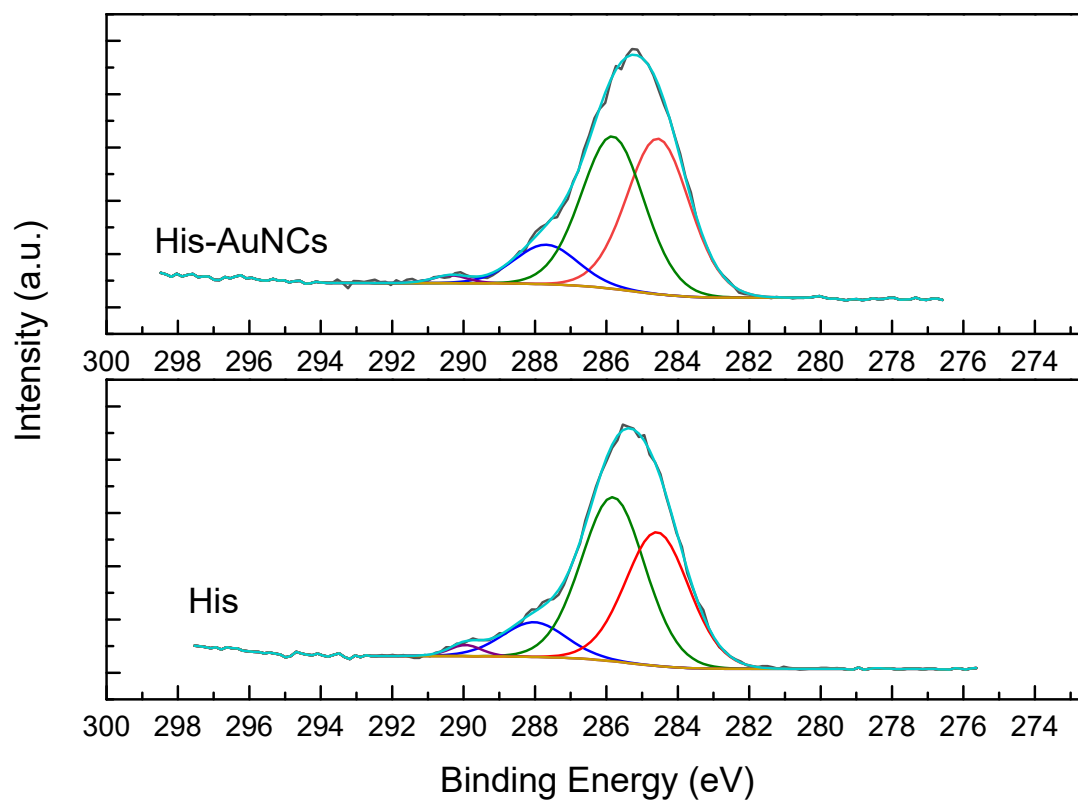

**Figure S9.** C1s core level spectra.

**Table S2.** Deconvolution of C1s spectra.

| Sample/component | C-C   | %    | C-N   | %    | C=O   | %    | O=C-OH | %   |
|------------------|-------|------|-------|------|-------|------|--------|-----|
|                  | C-H   |      | C-O   |      |       |      | N-C=O  |     |
| <b>His-AuNCs</b> | 284.6 | 44.2 | 285.8 | 43.3 | 287.7 | 11.3 | 290.3  | 1.2 |
| <b>His</b>       | 284.6 | 39.5 | 285.8 | 48.5 | 288   | 10.3 | 289.9  | 1.7 |

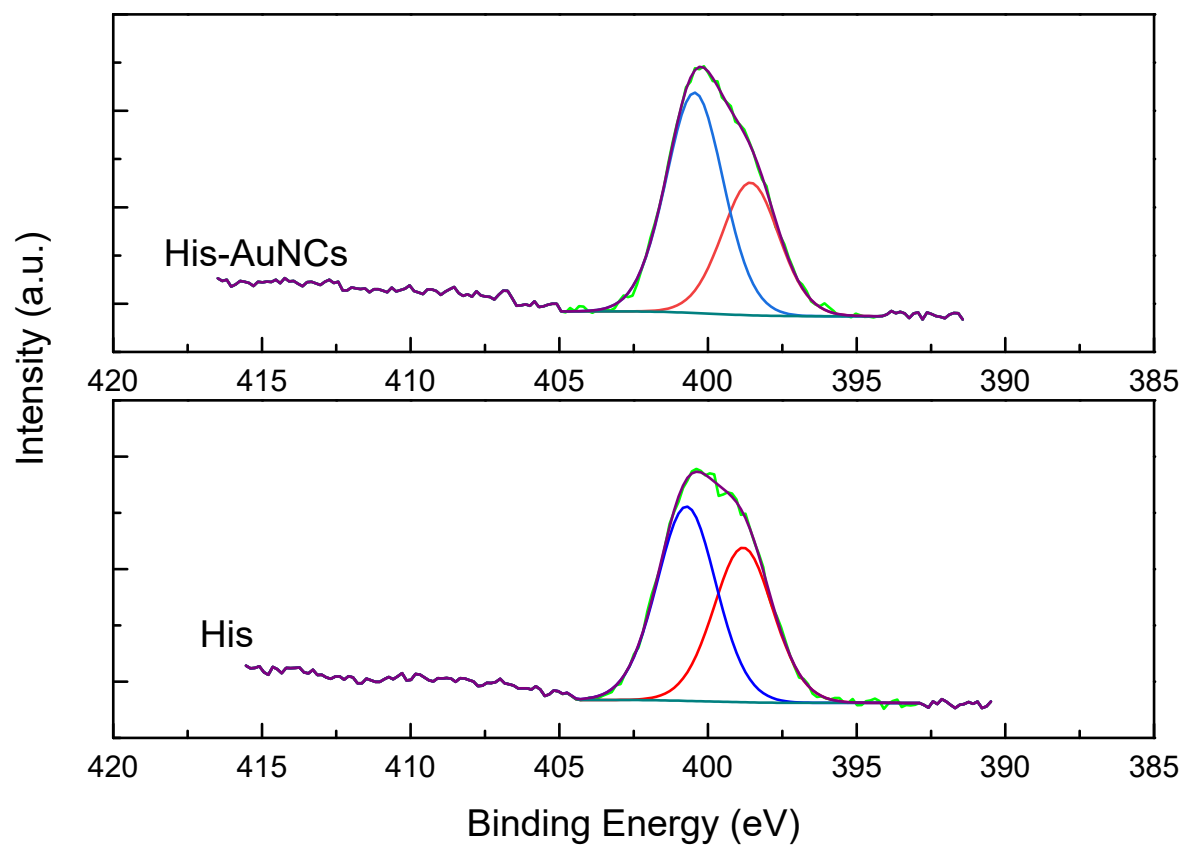

**Figure S10.** N1s core level spectra.

**Table S3.** Deconvolution of N1s spectra.

| Sample/component | Imino N in<br>IM ring | %    | (-NH <sub>2</sub> ) amino group<br>C-NH-C (IM-ring) | %    |
|------------------|-----------------------|------|-----------------------------------------------------|------|
| His-AuNCs        | 398.6                 | 37.6 | 400.5                                               | 62.4 |
| His              | 398.8                 | 44.3 | 400.7                                               | 55.7 |



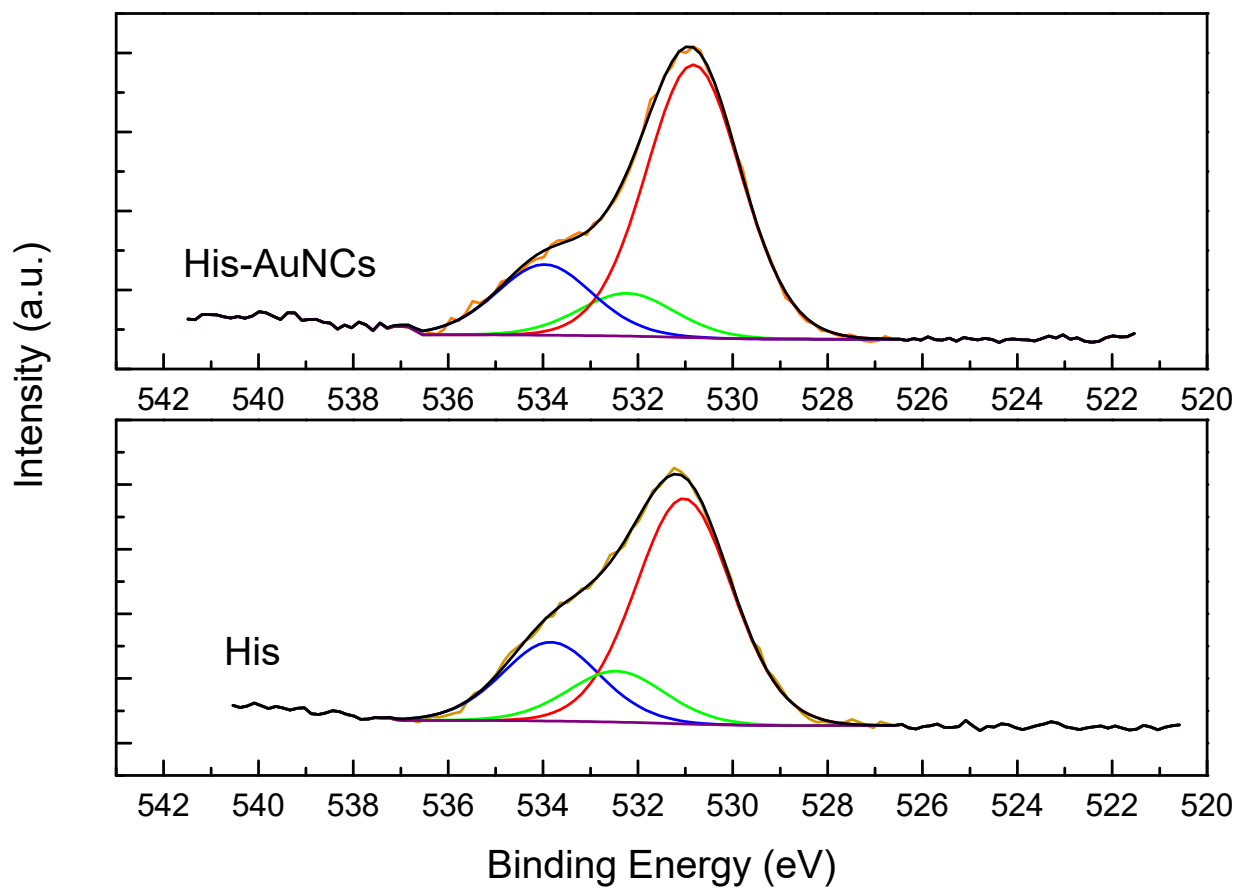

Figure S11. O1s core level spectra.

Table S4. Deconvolution of O1s spectra

| Sample/component | HO-C=O       |      | C-OH  |      | O=C-O |      |
|------------------|--------------|------|-------|------|-------|------|
|                  | O=C-N<br>C=O | %    | O=C-O | %    | C-O-C | %    |
| His-AuNCs        | 530.8        | 70.6 | 532.2 | 11.1 | 533.9 | 18.3 |
| His              | 531          | 63.4 | 532.4 | 14.4 | 533.8 | 22.2 |

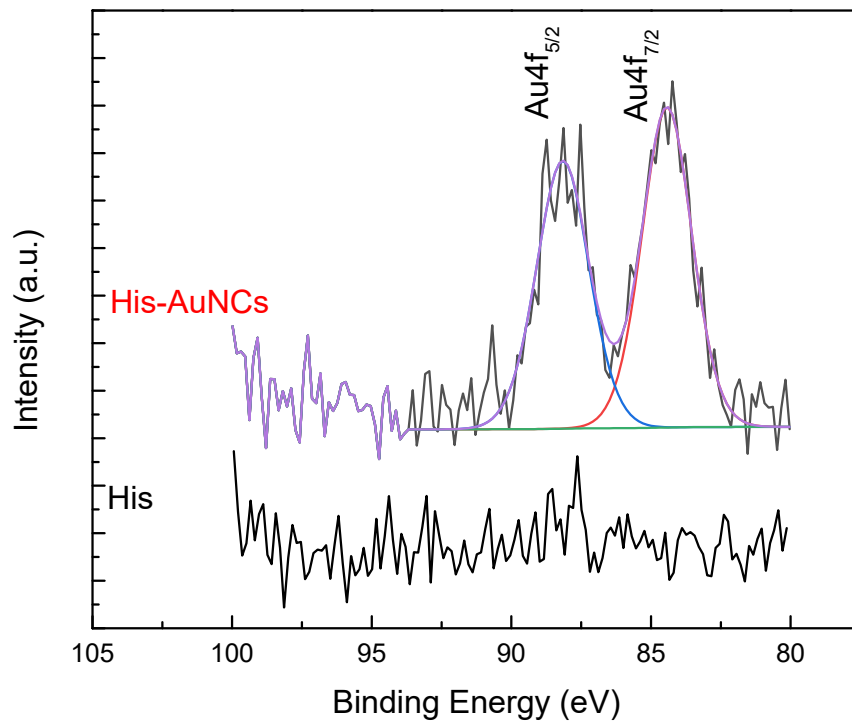

**Figure S12.** Au4f core level spectra.

**Table S5.** deconvolution of Au4f spectra

| Sample/component | Au4f <sub>7/2</sub> | %    | Au4f <sub>5/2</sub> | %    |
|------------------|---------------------|------|---------------------|------|
| His-AuNCs        | 84.5                | 57.1 | 88.2                | 42.9 |
| His              | -                   | -    | -                   | -    |

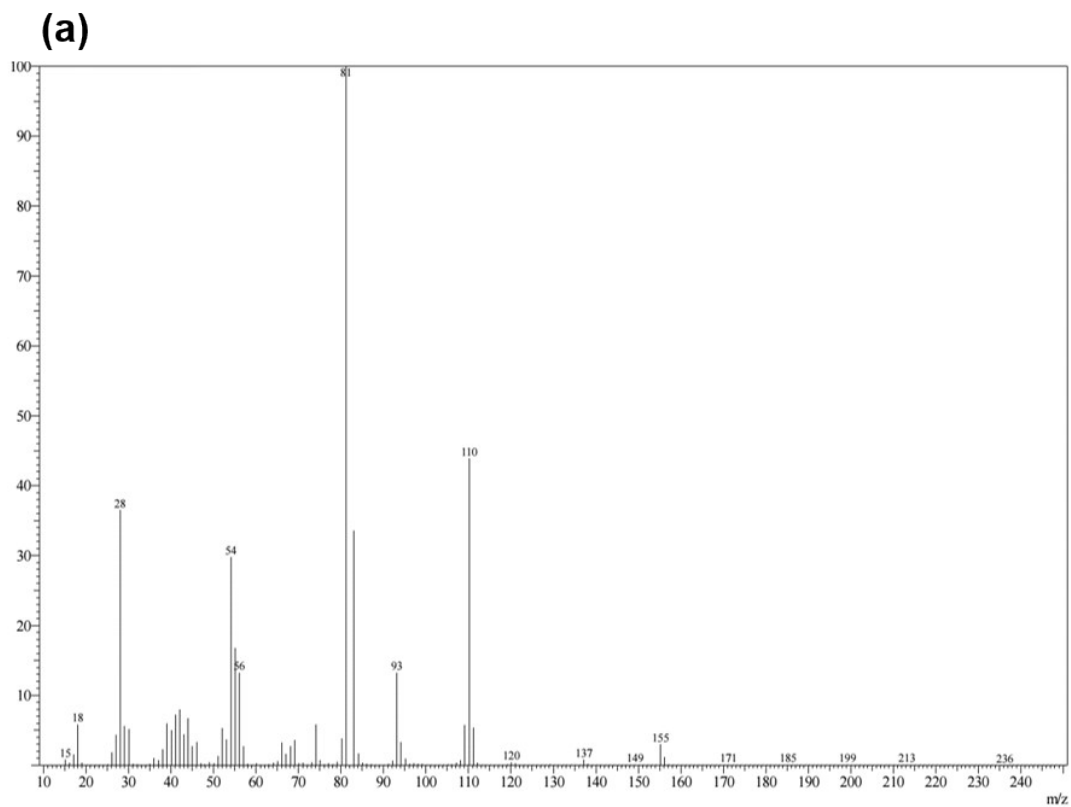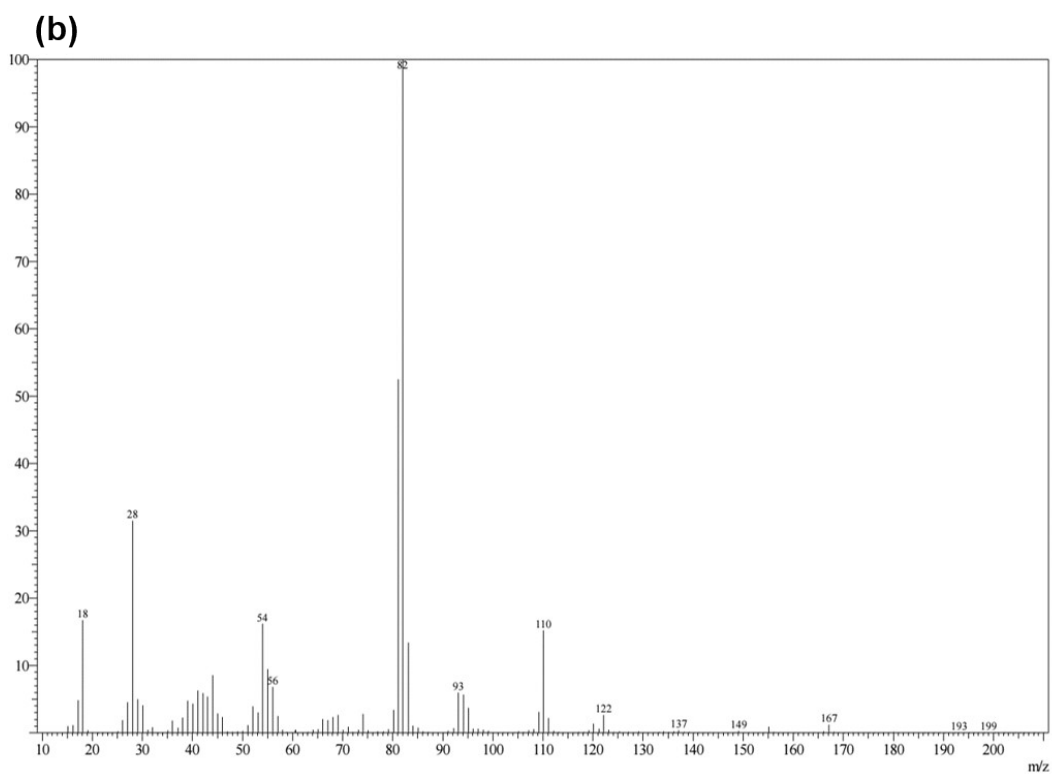

**Figure S13.** The EI mass spectra of His (a) and His-AuNCs (b).

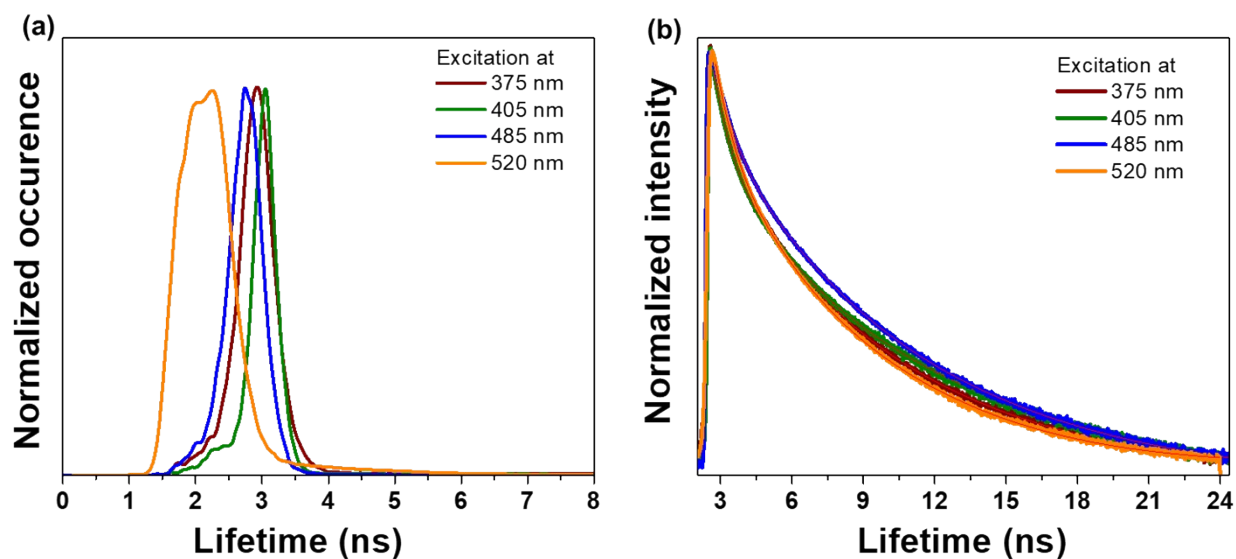

**Figure S14.** (a) Lifetime histograms extracted from the FLIM images recorded at different excitation wavelengths (see FLIM images in Figure 4a – bottom row). (b) Fluorescence lifetime decay curves obtained for powder His-AuNCs at different excitation wavelengths.

**Table S6.** The average PL lifetime obtained for His-AuNCs in solid state under different excitation wavelengths.

| Excitation (nm)       | 375  | 405  | 485 | 520  |
|-----------------------|------|------|-----|------|
| Average lifetime (ns) | 2.38 | 2.75 | 2.7 | 2.15 |

Average lifetime represents the intensity-weighted average lifetime calculated with the

$$\tau_{av int} = \frac{\sum_1^n a_i \tau_i^2}{\sum_1^n a_i \tau_i};$$

formula  $\tau_i$  and  $a_i$  are the fluorescence lifetime components and corresponding amplitudes, respectively.

**Table S7.** The CIE color coordinates of His-AuNCs obtained at different excitation wavelengths.

| <b>Excitation (nm)</b> | <b>340</b> | <b>365</b> | <b>380</b> | <b>400</b> | <b>420</b> |
|------------------------|------------|------------|------------|------------|------------|
| <b>CIE</b>             | 0.39/0.35  | 0.38/0.34  | 0.37/0.34  | 0.37/0.34  | 0.36/0.33  |

**Table S8.** The CIE color coordinates of His-AuNCs after thermal treatment ( $\lambda_{\text{exc}} = 365$  nm).

| <b>Temperature (°C)</b> | <b>25</b> | <b>50</b> | <b>100</b> | <b>150</b> | <b>200</b> |
|-------------------------|-----------|-----------|------------|------------|------------|
| <b>CIE</b>              | 0.38/0.34 | 0.38/0.34 | 0.38/0.34  | 0.38/0.34  | 0.12/0.04  |
